# Supplementary material for: Differential lipid selectivity of StARD phospholipid transporters revealed by native MS
Source: Research Square preprint supplement (doi:10.21203/rs.3.rs-8591680/v1), 2026-01-21
Supplement: Supplementary file 1 [file 436dc8d5cf3a2881e156ec97.pdf]

## Supporting Information for:

### **Differential lipid selectivity of StARD phospholipid transporters revealed by native MS**

Carla Kirschbaum<sup>a,b\*</sup>, Sophie A. S. Lawrence<sup>a,b</sup>, Jack L. Bennett<sup>a,b</sup>, Olivia B. Ramsay<sup>a,c</sup>, Yara Ahmed<sup>d,e</sup>, Tarick J. El-Baba<sup>a,b</sup>, Stefano Vanni<sup>d,e</sup>, Carol V. Robinson<sup>a,b\*</sup>

a Kavli Institute for Nanoscience Discovery, University of Oxford, Oxford OX1 3QU, United Kingdom

b Department of Chemistry, University of Oxford, Oxford OX1 3QZ, United Kingdom

c Department of Oncology, University of Oxford, Oxford OX3 7DQ, United Kingdom

d Department of Biology, University of Fribourg, Fribourg, Switzerland

e Swiss National Center for Competence in Research Bio-inspired Materials, University of Fribourg, Fribourg, Switzerland

Correspondence: [carla.kirschbaum@chem.ox.ac.uk](mailto:carla.kirschbaum@chem.ox.ac.uk), [carol.robinson@chem.ox.ac.uk](mailto:carol.robinson@chem.ox.ac.uk)

## Contents

|                                                                        |    |
|------------------------------------------------------------------------|----|
| Overview of investigated proteins .....                                | 2  |
| Table S1 .....                                                         | 2  |
| Characterization of StARD proteins expressed in <i>E. coli</i> .....   | 3  |
| Figure S1 .....                                                        | 3  |
| Figure S2 .....                                                        | 4  |
| Figure S3 .....                                                        | 5  |
| Figure S4 .....                                                        | 5  |
| Characterization of StARD proteins expressed in human cell lines ..... | 6  |
| Figure S5 .....                                                        | 6  |
| Table S2 .....                                                         | 7  |
| Table S3 .....                                                         | 8  |
| Figure S6 .....                                                        | 10 |
| Figure S7 .....                                                        | 10 |
| Figure S8 .....                                                        | 11 |
| Figure S9 .....                                                        | 12 |
| Figure S10 .....                                                       | 13 |
| Figure S11 .....                                                       | 13 |
| Figure S12 .....                                                       | 14 |
| Figure S13 .....                                                       | 15 |
| Figure S14 .....                                                       | 16 |
| Correlations between protein expression and lipid metabolism .....     | 17 |
| Figure S15 .....                                                       | 17 |
| Figure S16 .....                                                       | 18 |
| Figure S17 .....                                                       | 19 |
| Figure S18 .....                                                       | 20 |
| Table S4 .....                                                         | 20 |
| Figure S19 .....                                                       | 21 |
| Figure S20 .....                                                       | 22 |
| In vitro lipid transfer assays .....                                   | 23 |
| Figure S21 .....                                                       | 23 |
| Molecular dynamics simulations .....                                   | 24 |
| Figure S22 .....                                                       | 24 |
| References .....                                                       | 25 |

## Overview of investigated proteins

**Table S1.** Expected and measured masses of proteins investigated in this work.

| Protein                              | Expected mass (kDa) | Measured mass (KDa) |
|--------------------------------------|---------------------|---------------------|
| <b>Expressed in <i>E. coli</i></b>   |                     |                     |
| STARD2                               | 25.038              | 25.036              |
| STARD2 R78Q                          | 25.009              | 25.008              |
| STARD7(76–370)                       | 34.891              | 34.886              |
| STARD7(76–370) R189Q                 | 34.863              | 34.863              |
| STARD10                              | 33.242              | 33.238              |
| STARD10 R92Q                         | 33.215              | 33.214              |
| <b>Expressed in human cell lines</b> |                     |                     |
| STARD2-FLAG                          | 28.333              | 28.375 (+42 Da)     |
| STARD7-FLAG (79-370)                 | 37.914              | 37.914              |
| STARD10-FLAG                         | 36.539              | 36.741 (+202 Da)    |

## Characterization of StARD proteins expressed in *E. coli*

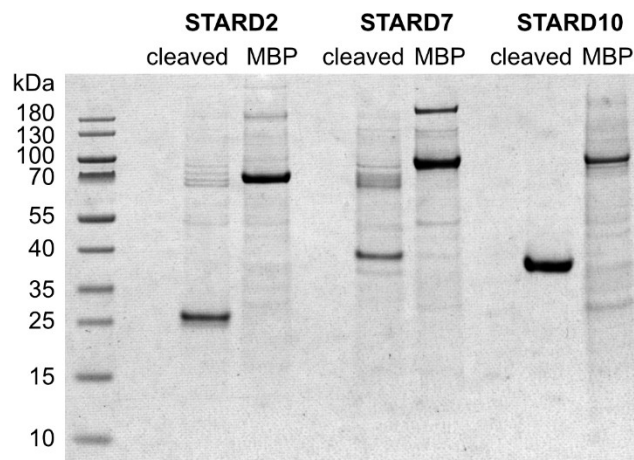

**Figure S1.** SDS-PAGE of STARD2, STARD7(76–370) and STARD10 expressed in *E. coli*, before and after cleavage of the N-terminal maltose-binding protein (MBP) tag.

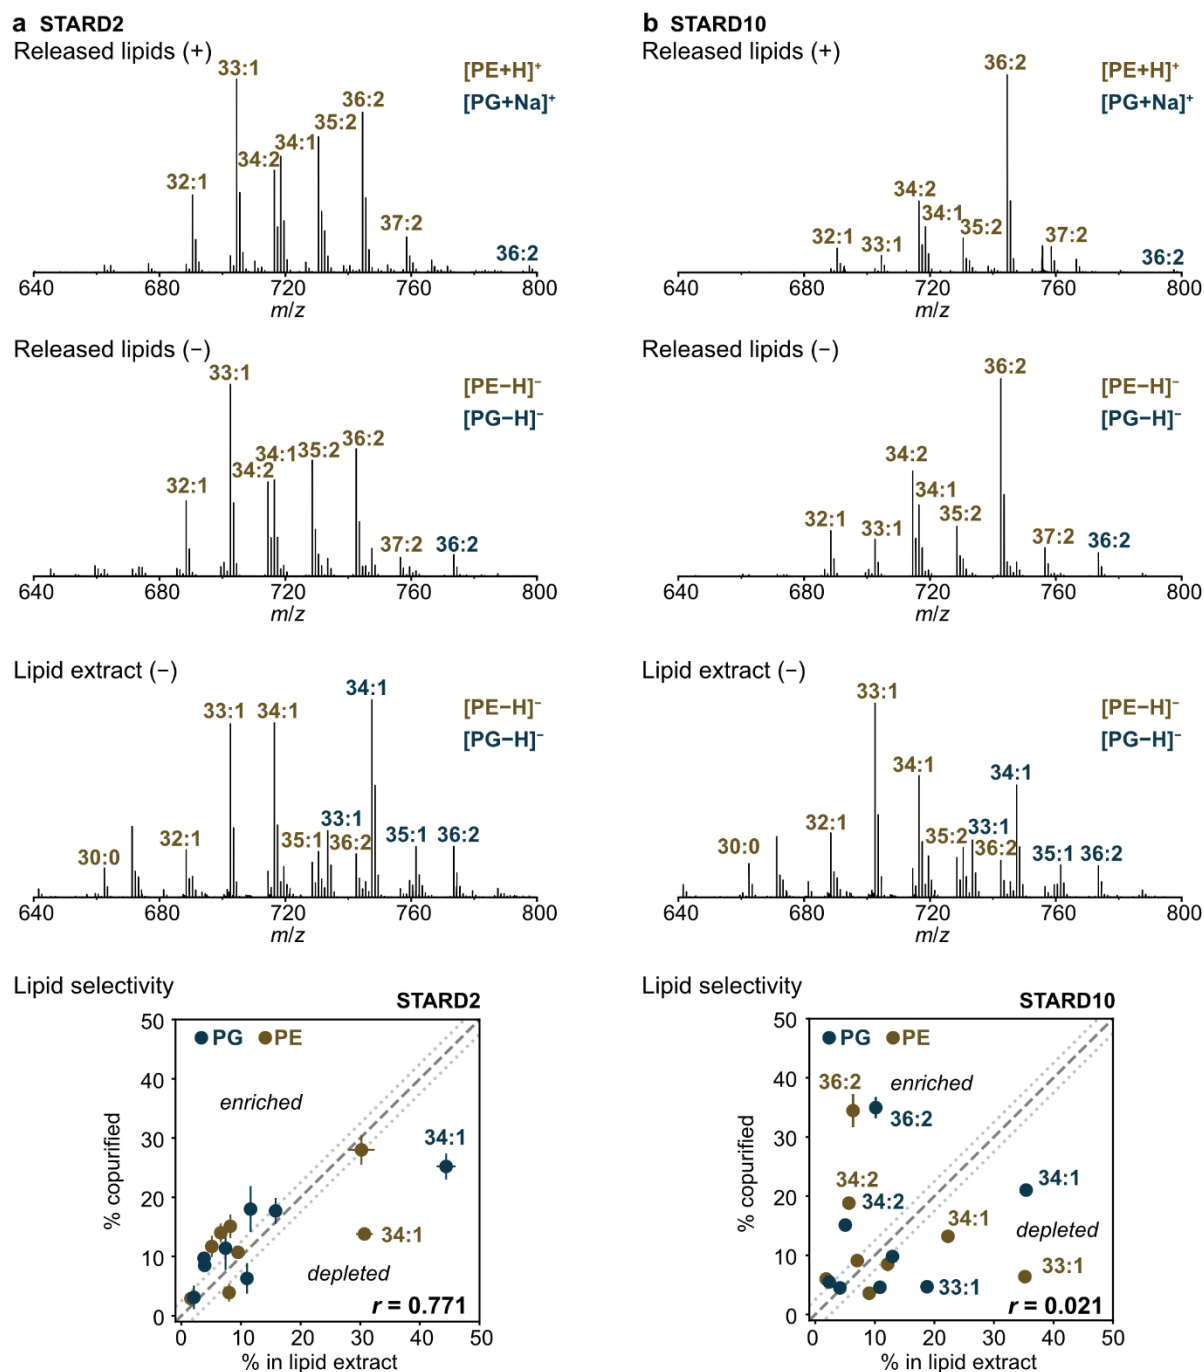

**Figure S2.** Lipids copurified with STARD2 and STARD10 upon expression in *E. coli*. **a.** PE and PG are released from STARD2 in positive and negative ion modes. The released lipids show a strong positive correlation with the bulk lipid composition of the STARD2-expressing cells (Pearson correlation coefficient = 0.771). **b.** PE and PG copurified with STARD10 show weak correlation with the membrane lipid composition of the STARD10-expressing cells (Pearson correlation coefficient = 0.021). PE and PG were quantified individually. The dotted grey lines indicate  $\pm 2.5\%$  deviation from the diagonal. Error bars represent the standard deviation of triplicate measurements.

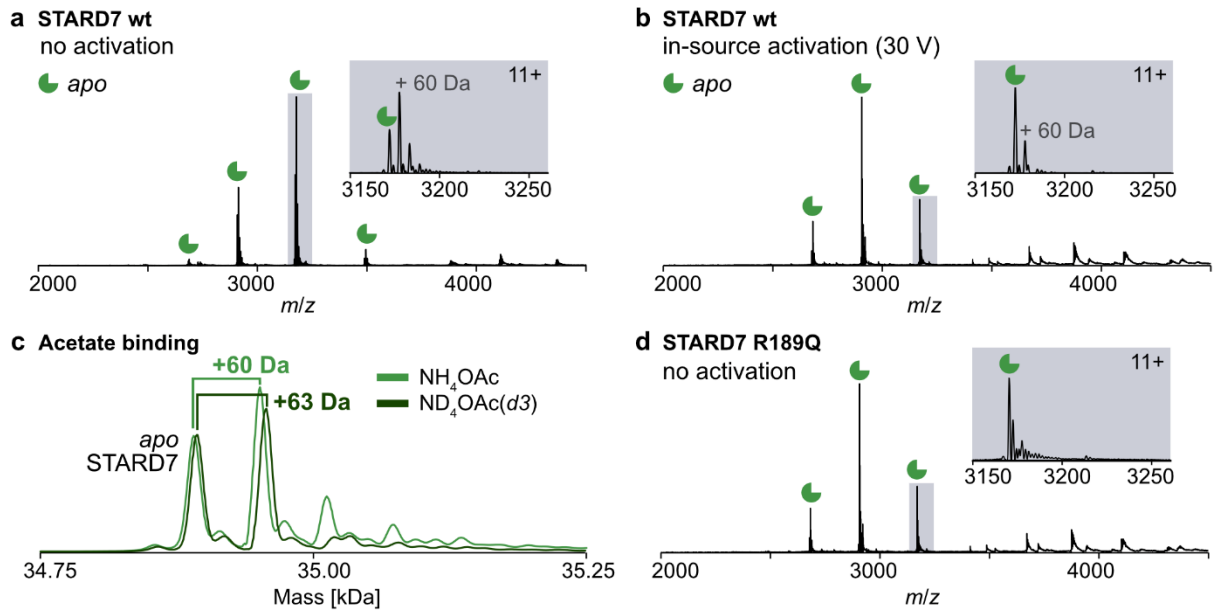

**Figure S3.** Acetate binding to STARD7. **a.** Wild-type STARD7(76–370) ionized in 200 mM ammonium acetate. **b.** Acetate dissociates from the protein with in-source activation (30 V). **c.** STARD7(76–370) ionized in 200 mM ammonium acetate-d7. **d.** The STARD7(76–370) R189Q mutant ionized in 200 mM ammonium acetate shows significantly reduced acetate binding.

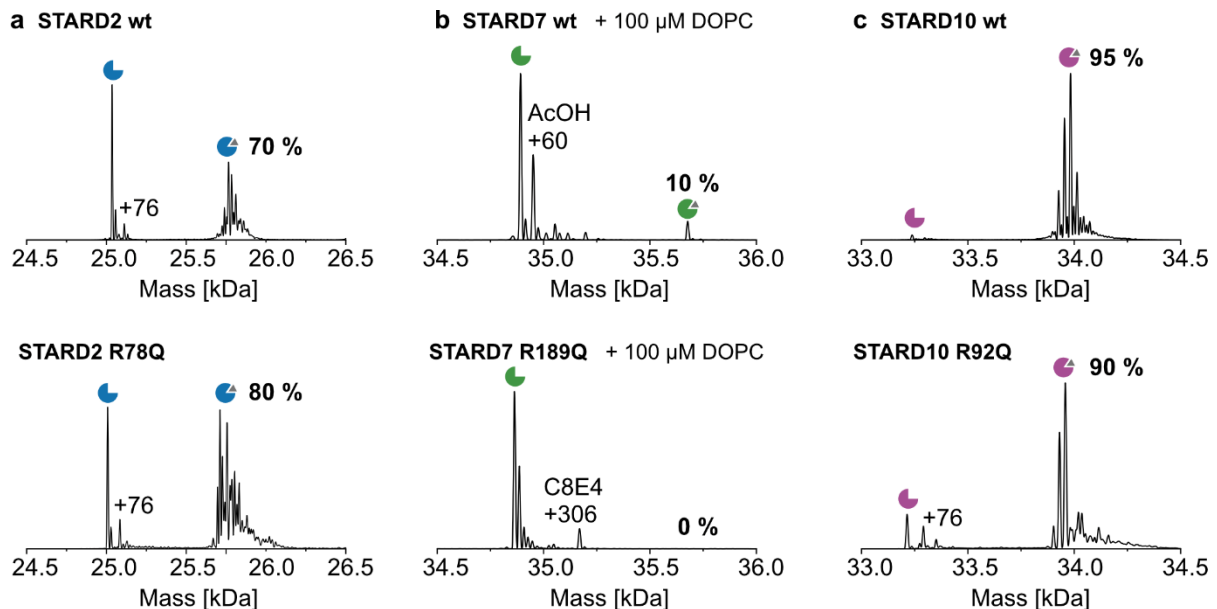

**Figure S4.** Lipid binding to STARD2 R78Q, STARD7(76–370) R189Q and STARD10 R92Q arginine-to-glutamine mutants. The point mutation does not reduce the ratio of phospholipids copurifying with STARD2 (**a**) and STARD10 (**c**) but abolishes lipid binding to STARD7(76–370) (**b**). The STARD7(76–370) R189Q mutant neither binds acetate nor phospholipids, when incubated with 100  $\mu$ M DOPC in ammonium acetate + 2 $\times$ CMC C8E4. Percentages are rounded to  $\pm 5$  %.

## Characterization of StARD proteins expressed in human cell lines

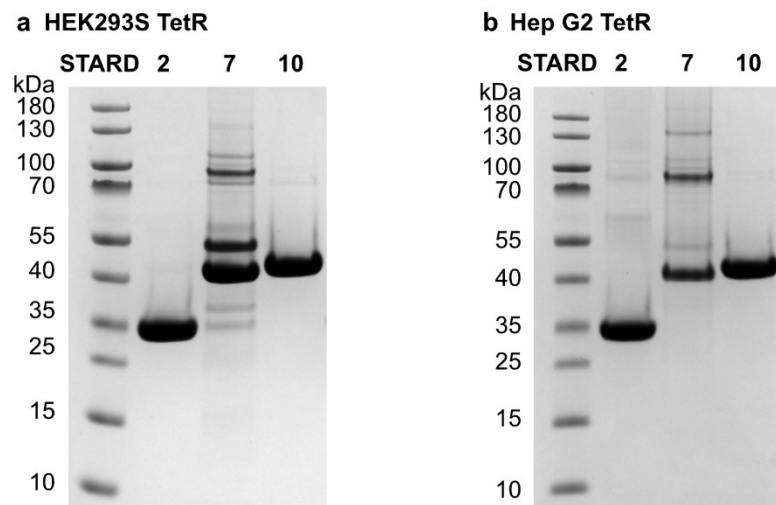

**Figure S5.** SDS-PAGE of STARD2, STARD7 and STARD10 expressed in HEK293S TetR cells (a) and HepG2 TetR cells (b) after elution from anti-FLAG beads.

**Table S2.** Characterization and quantification of phospholipids copurified with STARD2, STARD7 and STARD10 upon expression in HEK293S cells.

| <b>HEK293S</b> |         |             |                                                                                   |                                                                                    |                                                                                     |
|----------------|---------|-------------|-----------------------------------------------------------------------------------|------------------------------------------------------------------------------------|-------------------------------------------------------------------------------------|
| <i>m/z</i> (+) | Sum     | Fatty acids | STARD2                                                                            | STARD7                                                                             | STARD10                                                                             |
| 704.52         | PC 30:1 | 14:0_16:1   |  |   |  |
| 730.54         | PC 32:2 | 16:1_16:1   |  |   |  |
| 732.55         | PC 32:1 | 16:0_16:1   |  |  |  |
| 758.57         | PC 34:2 | 16:1_18:1   |  |  |  |
| 760.59         | PC 34:1 | 16:0_18:1   |  |  |  |
| 786.60         | PC 36:2 | 18:1_18:1   |  |  |  |
| 788.62         | PC 36:1 | 18:0_18:1   |  |   |  |
| 814.63         | PC 38:2 | 18:1_20:1   |  |   |  |

  

| <i>m/z</i> (-) | Sum       | Fatty acids | STARD10                                                                               |
|----------------|-----------|-------------|---------------------------------------------------------------------------------------|
| 698.51         | PE-P 34:2 | 16:1_18:1   |  |
| 700.53         | PE-P 34:1 | 16:0_18:1   |  |
| 714.51         | PE 34:2   | 16:1_18:1   |  |
| 716.52         | PE 34:1   | 16:0_18:1   |  |
| 724.53         | PE-P 36:3 | 18:1_18:2   |  |
| 726.54         | PE-P 36:2 | 18:1_18:1   |  |
| 740.52         | PE 36:3   | 18:1_18:2   |  |
| 742.54         | PE 36:2   | 18:1_18:1   |  |
| 773.53         | PG 36:2   | 18:1_18:1   |  |



**Table S3.** Characterization and quantification of phospholipids copurified with STARD2, STARD7 and STARD10 upon expression in HepG2 cells.

| HepG2          |         |                        | STARD2                                                                              | STARD7                                                                               | STARD10                                                                               |
|----------------|---------|------------------------|-------------------------------------------------------------------------------------|--------------------------------------------------------------------------------------|---------------------------------------------------------------------------------------|
| <i>m/z</i> (+) | Sum     | Fatty acids            |                                                                                     |                                                                                      |                                                                                       |
| 730.54         | PC 32:2 | 16:1_16:1              |    |    |    |
| 732.55         | PC 32:1 | 16:0_16:1              |    |    |    |
| 756.55         | PC 34:3 | 16:0_18:3<br>16:1_18:2 |    |    |    |
| 758.57         | PC 34:2 | 16:1_18:1<br>16:0_18:2 |    |    |    |
| 760.59         | PC 34:1 | 16:0_18:1              |    |    |    |
| 780.55         | PC 36:5 | n.a.                   |    |    |    |
| 782.57         | PC 36:4 | n.a.                   |    |    |    |
| 784.59         | PC 36:3 | 18:1_18:2              |    |    |    |
| 786.60         | PC 36:2 | 18:1_18:1              |   |   |   |
| 788.62         | PC 36:1 | 18:0_18:1              |  |  |  |
| 804.55         | PC 38:7 | 16:1_22:6              |  |  |  |
| 806.57         | PC 38:6 | 16:0_22:6              |  |  |  |
| 808.59         | PC 38:5 | 18:1_20:4              |  |  |  |
| 810.60         | PC 38:4 | 18:1_20:3              |  |  |  |
| 832.59         | PC 40:7 | 18:1_22:6              |  |  |  |

**Table S3 (continued).**

| <i>m/z</i> (-) | Sum     | Fatty acids                         | STARD10                                                                               |
|----------------|---------|-------------------------------------|---------------------------------------------------------------------------------------|
| 714.51         | PE 34:2 | 16:1_18:1                           |    |
| 738.51         | PE 36:4 | 18:1_18:3<br>16:0_20:4<br>16:1_20:3 |    |
| 740.52         | PE 36:3 | 18:1_18:2                           |    |
| 742.54         | PE 36:2 | 18:1_18:1                           |    |
| 760.49         | PE 38:7 | 16:1_22:6                           |    |
| 762.51         | PE 38:6 | 16:0_22:6<br>18:1_20:5              |    |
| 764.52         | PE 38:5 | 18:1_20:4                           |    |
| 766.54         | PE 38:4 | 18:1_20:3<br>18:0_20:4              |    |
| 788.52         | PE 40:7 | 18:1_22:6                           |    |
| 745.50         | PG 34:2 | 16:1_18:1                           |  |
| 747.52         | PG 34:1 | 16:0_18:1<br>16:1_18:0              |  |
| 769.50         | PG 36:4 | 16:1_20:3<br>18:2_18:2              |  |
| 771.52         | PG 36:3 | 18:1_18:2                           |  |
| 773.53         | PG 36:2 | 18:1_18:1                           |  |
| 797.53         | PG 38:4 | 18:1_20:3                           |  |
| 799.55         | PG 38:3 | 18:1_20:2<br>18:0_20:3              |  |
| 819.52         | PG 40:7 | 18:1_22:6                           |  |

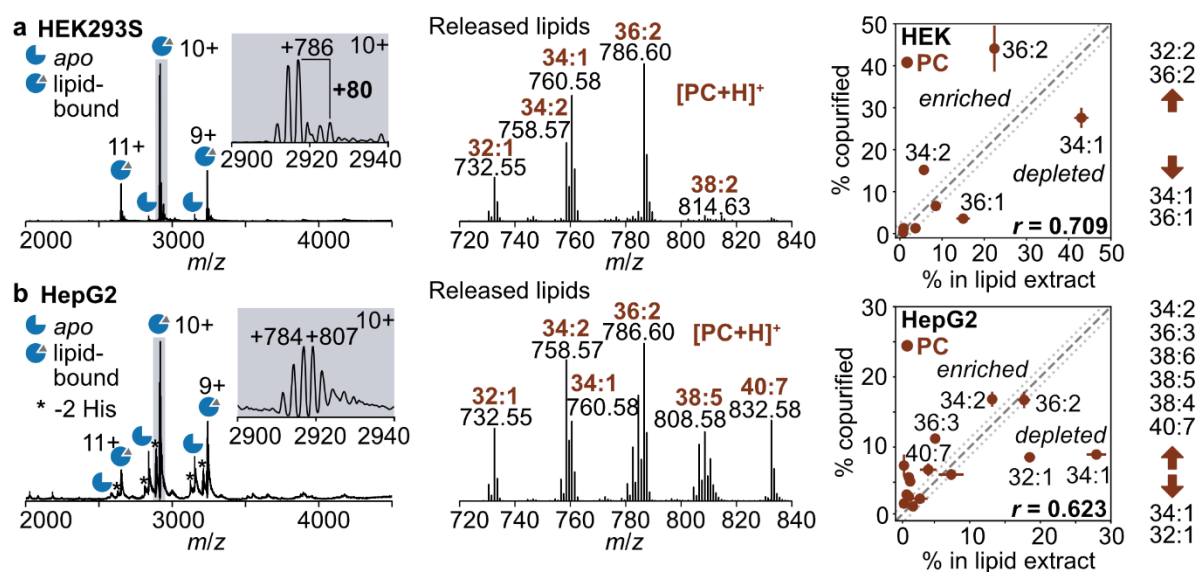

**Figure S6.** Ligands of STARD2 expressed in HEK293S (a) and HepG2 (b) cell lines. Monounsaturated PC lipids are consistently depleted across both cell lines.

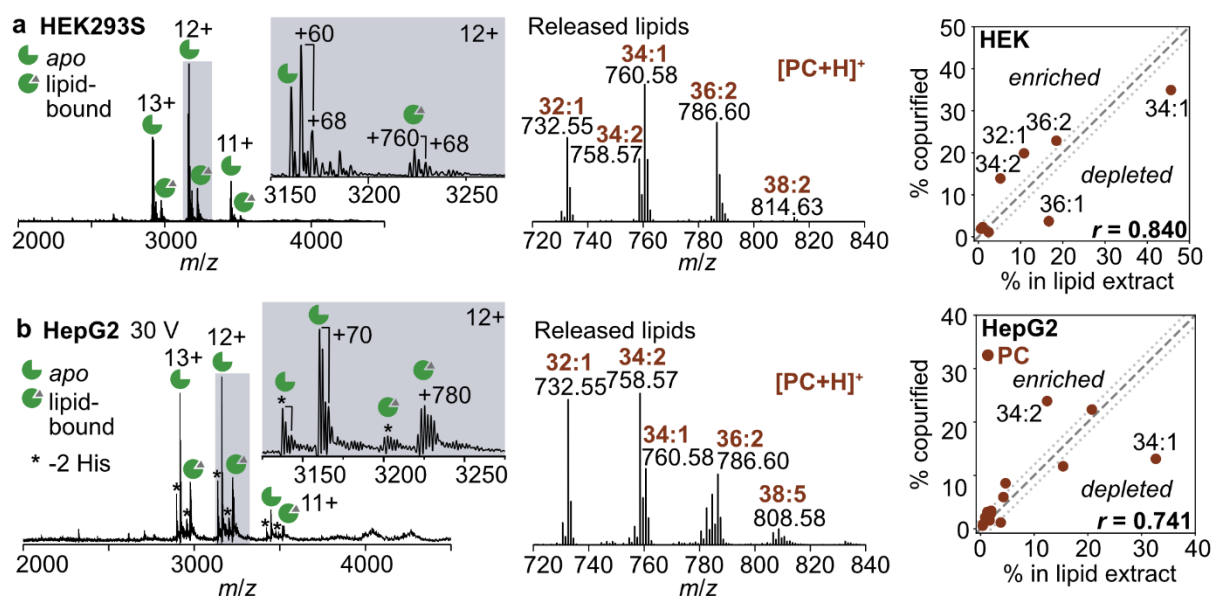

**Figure S7.** Ligands of STARD7 expressed in HEK293S (a) and HepG2 (b) cell lines. Phosphatidylcholines released from purified STARD7 show a high correlation with the cellular lipid composition, suggesting little acyl chain selectivity.

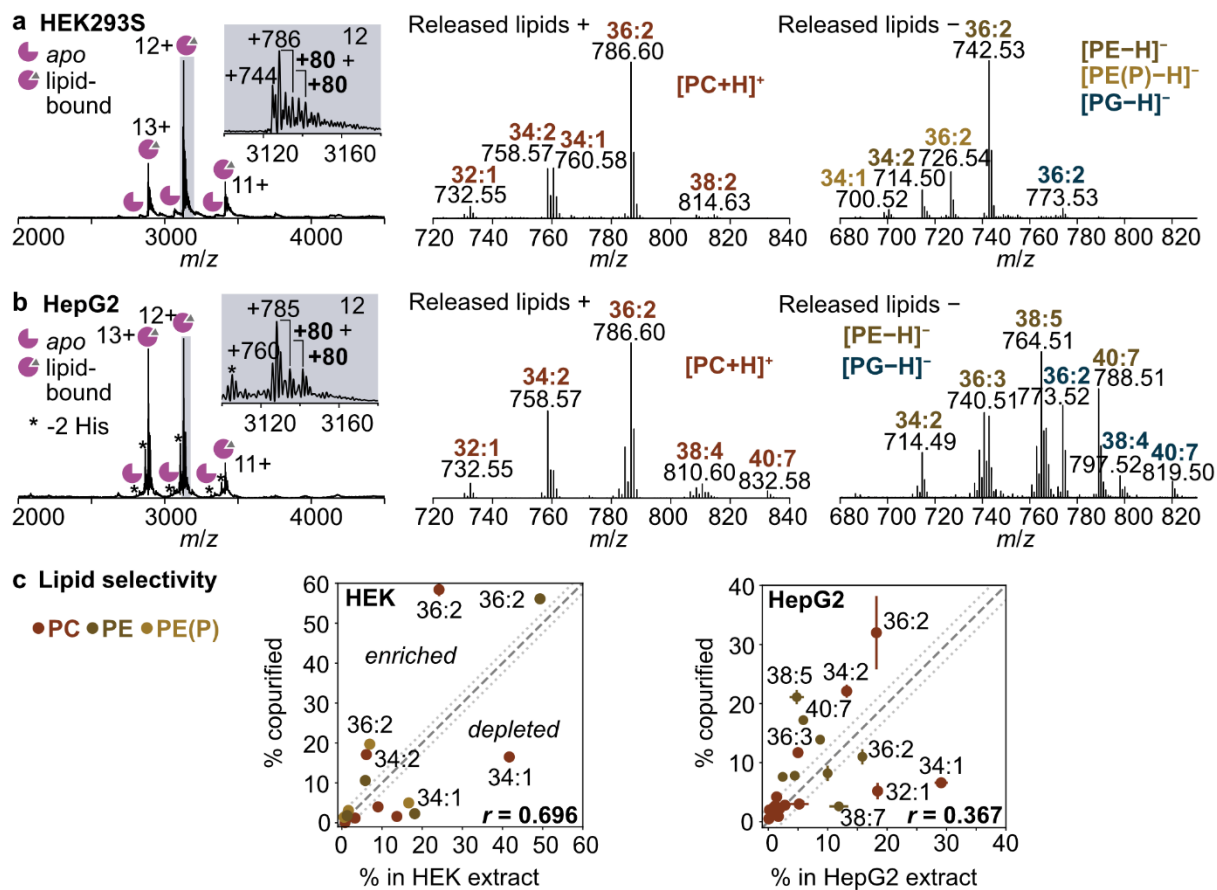

**Figure S8.** Ligands of STARD10 expressed in HEK293S (a) and HepG2 (b) cell lines. Phospholipids were released in positive and negative ion modes to detect different lipid classes. c. STARD10 copurifies with phospholipids with a high acyl chain selectivity, causing weak correlations between the copurified lipids and respective lipid extracts.

### a Native top-down MS of tagged STARD2

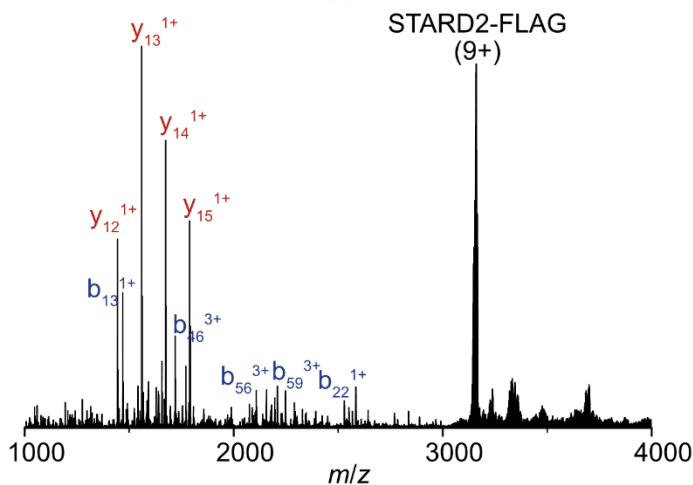

Acetyl

```

N M E L A A [G S F S E E] Q [F W E A] C [A E L] 20
21 Q [Q] [P A L] [A G A D] W Q L L V E T S G I S 40
41 I Y R L L [D] [K K] T G L Y E Y [K V] F [G V] L 60
61 E [D] C [S] P T L L A D I Y M D S D Y R K Q 80
81 W D Q Y V K E L Y E Q E C N G E T V V Y 100
101 W E V K Y P F P M S N R D Y V Y L R Q R 120
121 R D L D M E G R K I H V I L A R S T S M 140
141 P Q L G E R S G V I R V K Q Y K Q S L A 160
161 I E S D G K K G S K V F M Y Y F D N P G 180
181 G Q I P S W L I N W A A K N G V P N F L 200
201 K D M A R A C Q N Y L K K T G S G E N L 220
221 Y F Q G S G D Y K [D] [D] [D] [K] [G] [S] [G] [H] [H] 240
241 H H H H H C
  
```

### b Native top-down MS of untagged STARD2

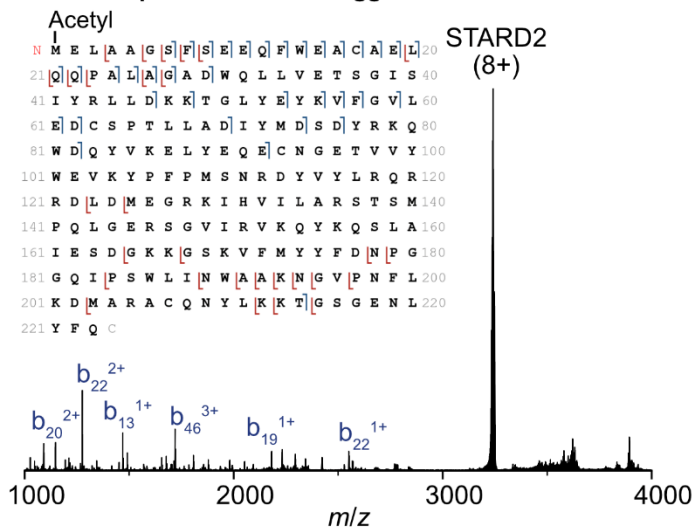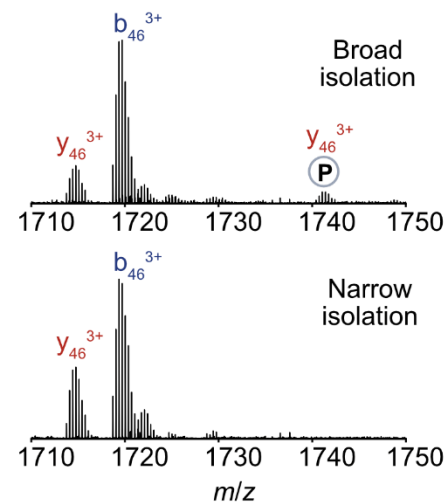

### c Localization of phosphorylation sites

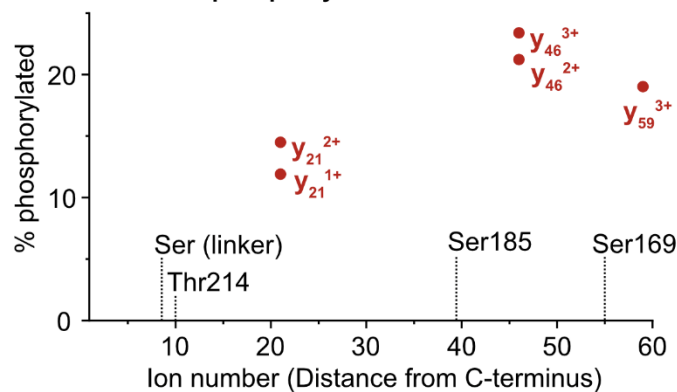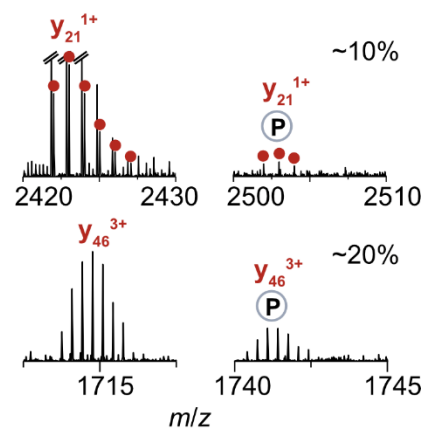

**Figure S9.** Native top-down MS of STARD2. **a.** Fragmentation of FLAG-tagged STARD2 (9+ charge state, HCD 80V) did not yield phosphorylated peptides. **b.** After cleavage of the FLAG tag, C-terminal fragments with hosphate modification were obtained (8+ charge state, HCD 70 V). Phosphorylated fragments were observed when the phosphorylated precursor ion was included in the isolation window ( $m/z$  3245  $\pm$  10), and were absent when the *apo* protein was isolated alone ( $m/z$  3240  $\pm$  5). **c.** Two phosphorylation sites with ca. 10 % occupancy each were detected: Thr214 or Ser in the GSG linker (exact position cannot be determined), and Ser185. Relative intensities of phosphorylated fragments are exemplarily shown for y21 and y46 ions. All b-type ions carry an acetyl modification, supporting N-acetylation of the protein.

## STARD2

MELAAGSFSEEQFWEACAE LQQPALAGADWQLLVETSGISYRLLDKKTGLYEYKVFVGVLDCSPTLLADIYMSDYSRKQWDQY  
 VKELYEQECNGETVVVYWEVKYFPFMSNRDYVYLRQRRDLMEGRKIHVILAR<sup>137</sup>STSMPLGERSGVIRVKQYKQSLAIESDGKKG  
<sup>171</sup>SKVFMYYFDNPGGQIP<sup>185</sup>SWLINWAAKNGVPNFLKDMARACQNYLK<sup>213</sup>KTGSGENLYFQGSGSDYKDDDDKSGSGHHHHHHHH

Linker TEV protease cleavage site FLAG tag His8 tag

**Figure S10.** Proteomics analysis of STARD2 after in-gel digestion. The sequence map shows detected phosphorylated peptides (underlined). All peptides are 2–3 % phosphorylated. Ser185 is highlighted.

### a Native top-down MS of STARD7

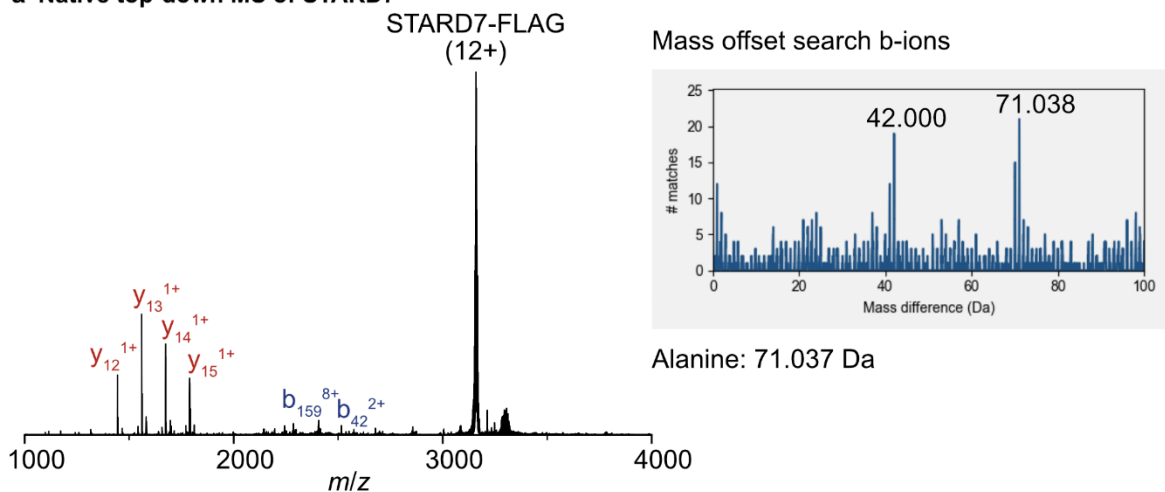

### b Fragment assignments for alternative signal peptide cleavage sites

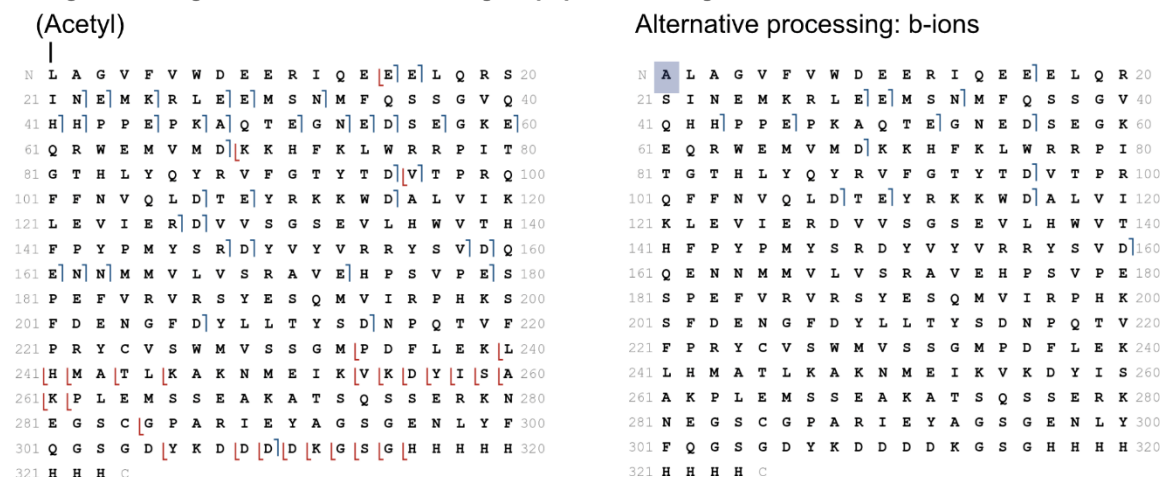

**Figure S11.** Native top-down MS of STARD7 (12+ charge state, HCD 100V). **a.** The majority of sequence ions can be assigned to STARD7 cleaved between A78 and L79. A mass offset search of unassigned fragment ions showed that another set of fragment ions is shifted by the mass of an additional alanine ( $\Delta m = 71$  Da), suggesting alternative cleavage between A77 and A78. **b.** Fragment maps for both protein isoforms are shown (blue: b-type ions, red: y-type ions). Because y-type ions are identical for both isoforms, only b-type ions revealing the alternative cleavage site are shown for the minor isoform.

**a Native top-down MS of tagged STARD10**

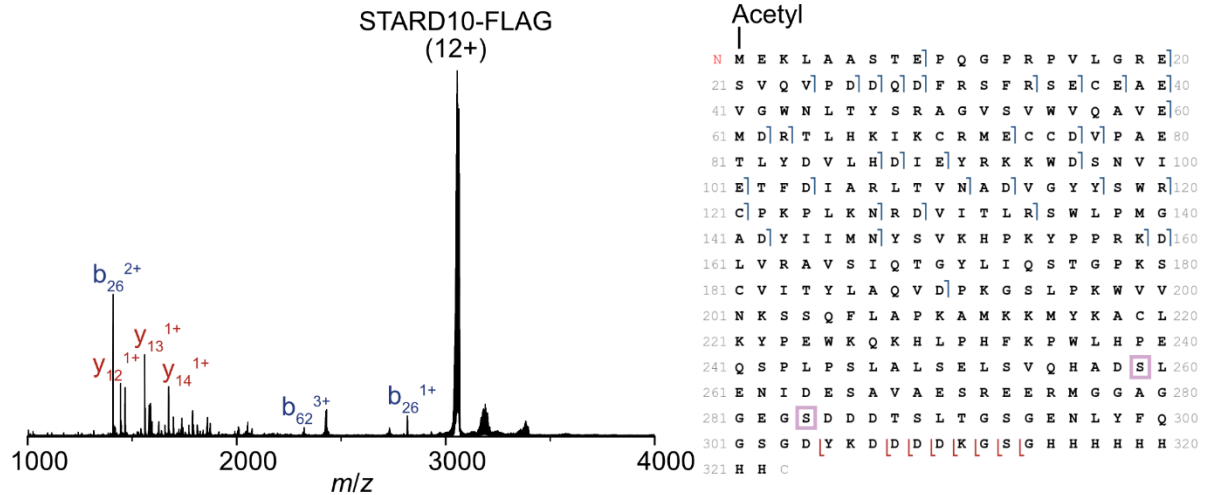

**b Native top-down MS of untagged STARD10**

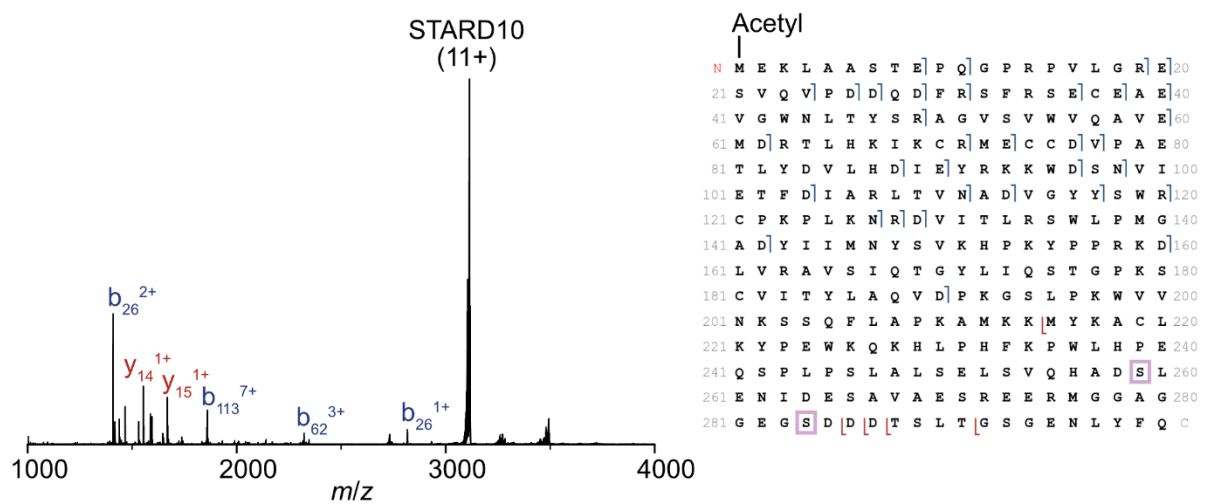

**Figure S12.** Native top-down MS of STARD10. Fragmentation of **a.** FLAG-tagged STARD10 (12+ charge state, HCD 80V) and **b.** untagged STARD10 (11+ charge state, HCD 70 V) did not yield phosphorylated fragments. Fragments were not generated in the region containing the two main phosphorylation sites (S259 and S284; pink). Detected cleavage sites are indicated in the sequence map (blue: b-type ions, red: y-type ions). All detected b-type ions carry an acetyl modification, supporting complete N-acetylation of the protein.

### STARD10

MEKLAAS<sup>259</sup>TEPQGPRPVLGRESVQVPDDQDFRSFRSECEAEVGWNLTYSRAGVSVWVQAVEMDRTLHKIKRMECCDVPAETL  
YDVLHDIEYRKKWDSNVIETFDIARLTVNADVGYYSWRCPKPLKNRDVITLRSWLPMGADYIIMNYSVKHPKYPPRKDLVRAVSI  
QTGYLIQSTGPKSCVITYLAQVDPKGS<sup>276</sup>LPKWVVKSSQFLAPKAMKKMYKACLKYPEWKQK<sup>284</sup>HLP<sup>229</sup>HFKPWLHPEQSPLPSLALSE  
LSVQHAD<sup>259</sup>SL<sup>276</sup>ENIDESA<sup>284</sup>VAESREERMGGAGGEGSDDDTSLTGS<sup>259</sup>GENLYFQGS<sup>276</sup>GDYKDDDDKGS<sup>284</sup>HHHHHHHHH

Linker TEV protease cleavage site FLAG tag His8 tag

**Figure S13.** Proteomics analysis of STARD10. The sequence map shows two detected peptides with phosphate modifications (underlined). Both peptides were 90–95 % phosphorylated. The main phosphorylation sites are highlighted (Ser259 and Ser284).



**a** ETHcD of STARD10 with 2 phosphates

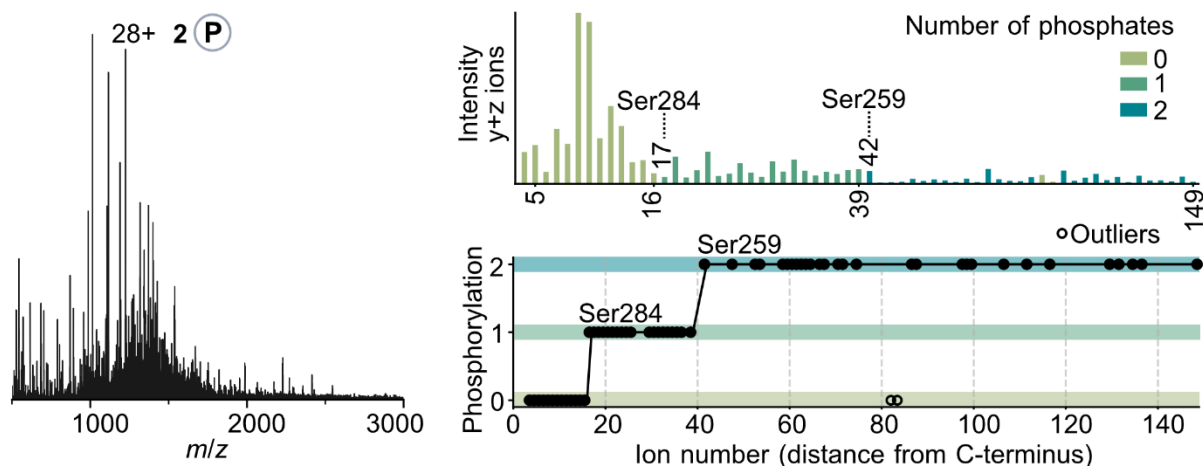

**b** ETHcD of STARD10 with 3 phosphates

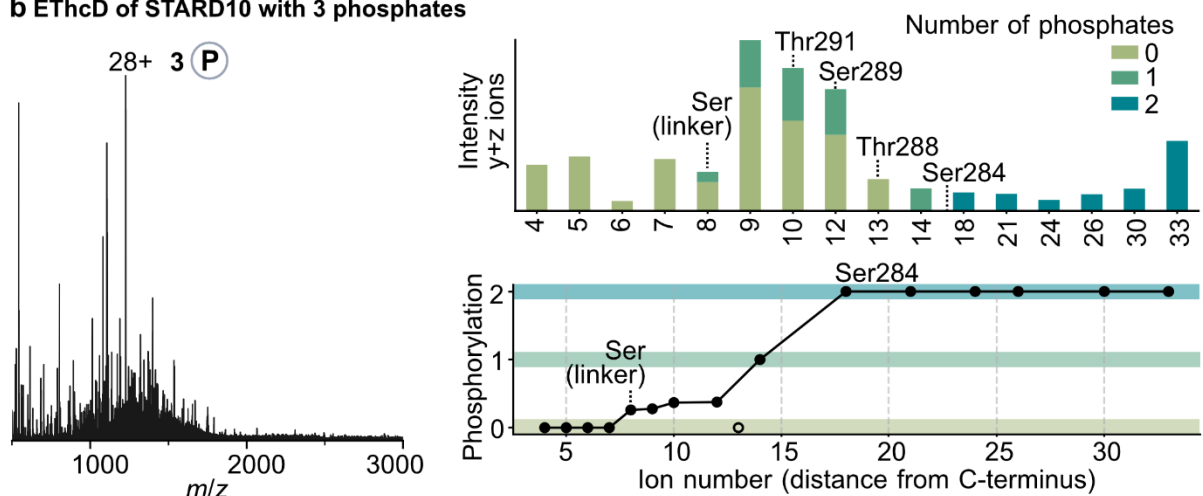

**c** ETHcD of STARD10 with 4 phosphates

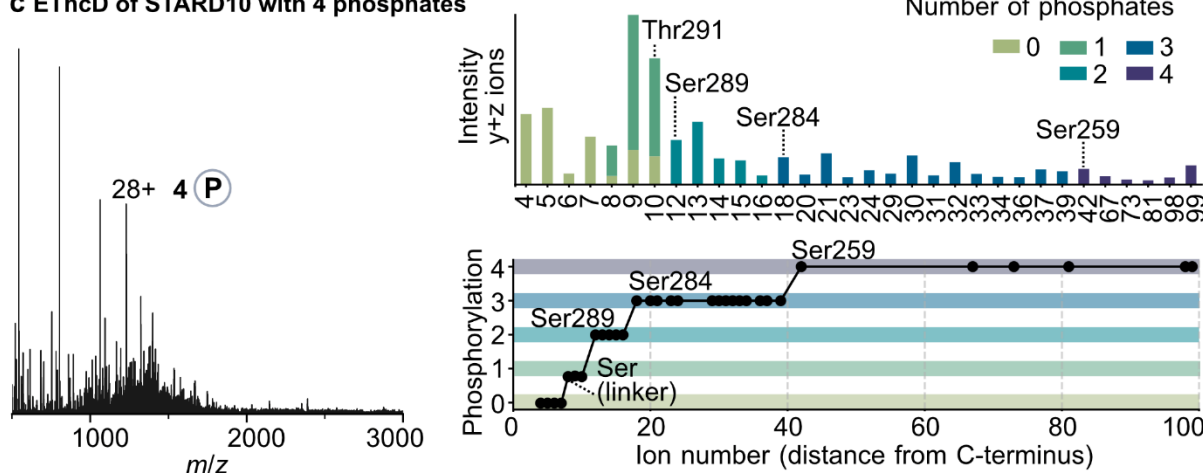

**Figure S14.** Denaturing top-down MS of STARD10 enables mapping of phosphorylation sites. STARD10 (28+ charge state) carrying two ( $m/z$  1224  $\pm$  1), three ( $m/z$  1228  $\pm$  1) or four ( $m/z$  1230  $\pm$  1) phosphates was fragmented by ETHcD (1.5 ms, 30 % NCE). By comparing the number of phosphates on y- and z-ions of different length, phosphorylation sites were mapped. Ser284 and Ser259 are constitutively phosphorylated. Additional, partially occupied phosphorylation sites include the serine in the linker (GSG) and three C-terminal residues (Thr288, Ser289, Thr291).

## Correlations between protein expression and lipid metabolism

### a Lipid extracts from HEK293S cells

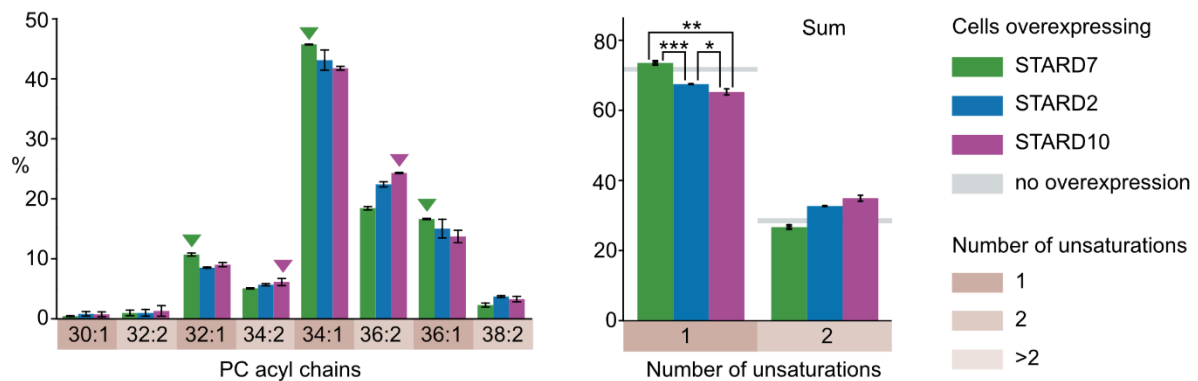

### b Lipid extracts from HepG2 cells

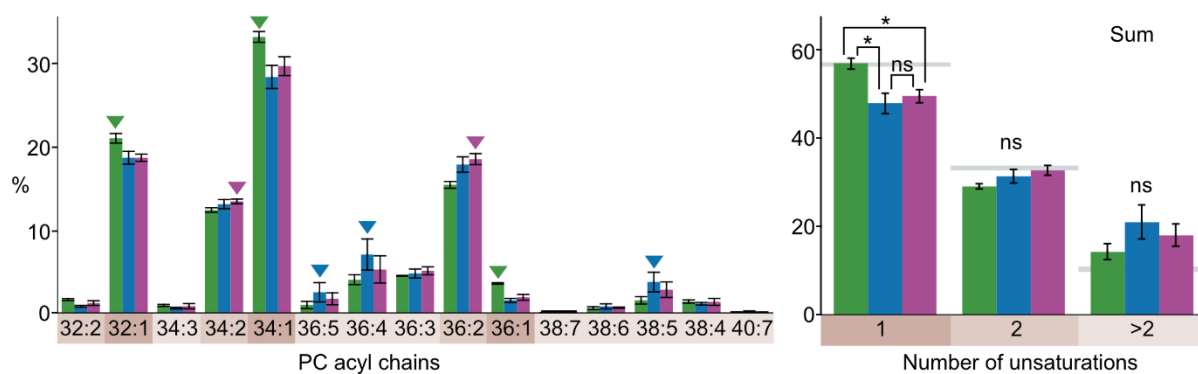

**Figure S15.** Overexpression of STARD2, STARD7 or STARD10 in HEK293S and HepG2 cell lines consistently changes cellular lipid profiles. **a.** Lipid extraction from HEK293S cells overexpressing STARD2, STARD7 or STARD10 shows that LTPs shift cellular PC ratios according to their acyl chain selectivities **b.** Lipid extraction from HepG2 cells overexpressing STARD2, STARD7 or STARD10 confirms a reduced ratio of monounsaturated PC upon overexpression of STARD2 and STARD10.

# **Lipid extracts from HEK293S cells**

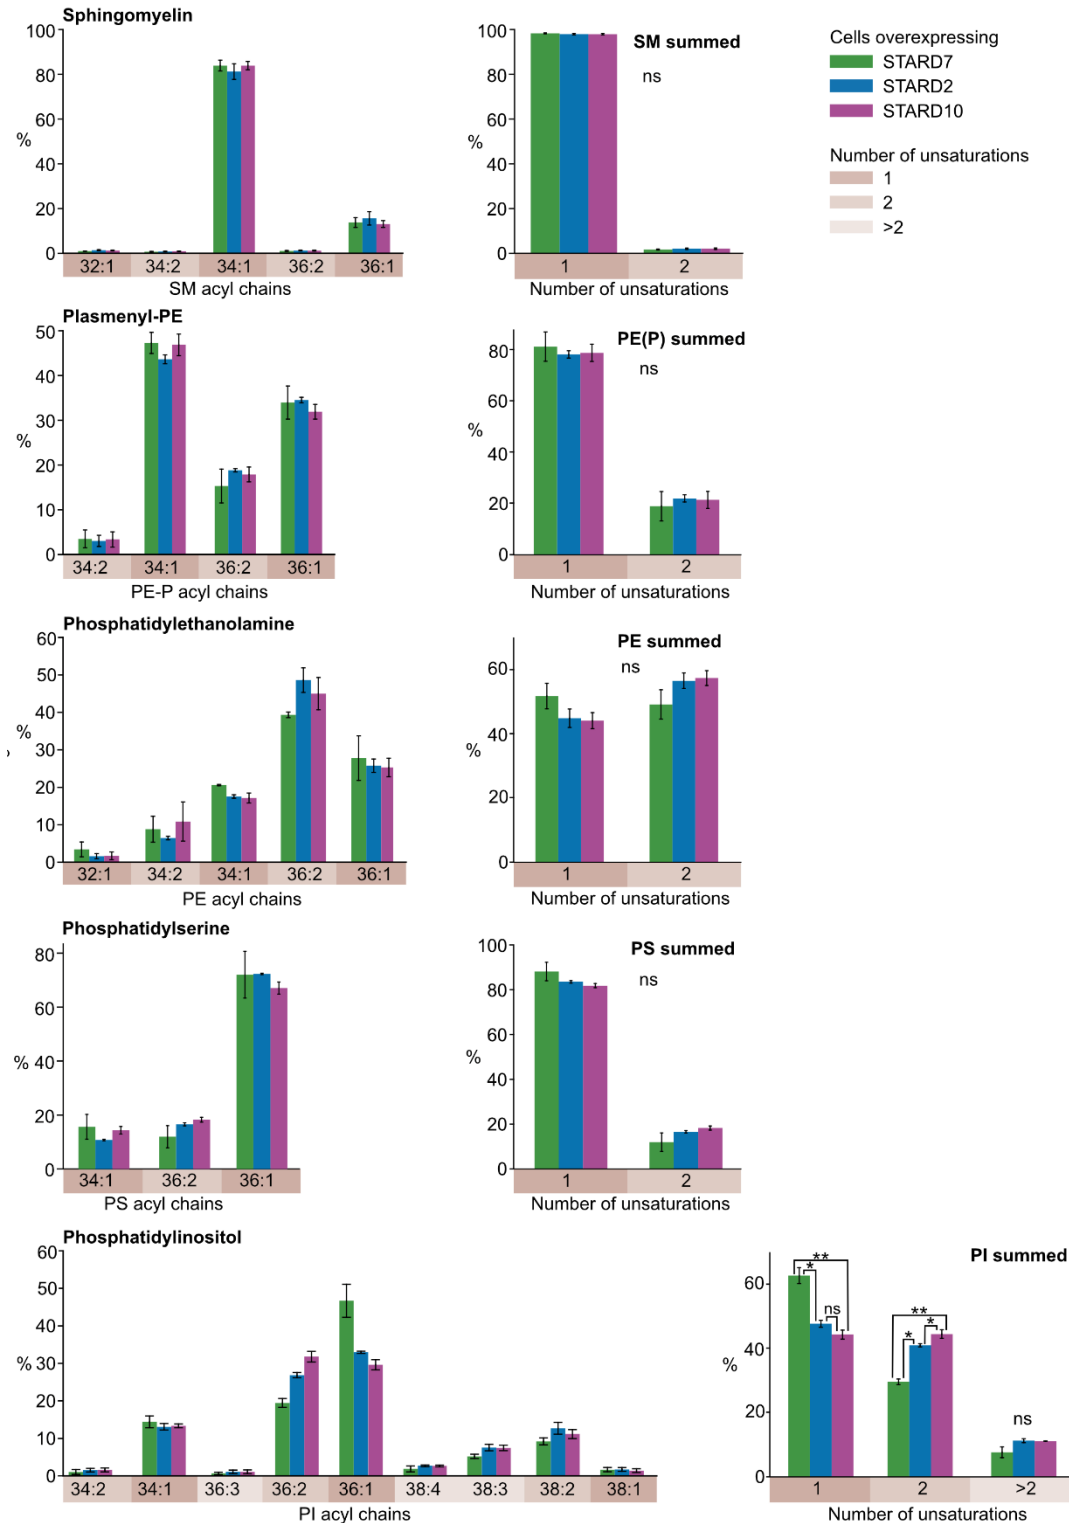

**Figure S16.** Acyl chain profiles of different phospholipid classes in HEK293S cells overexpressing STARD2, STARD7 or STARD10. PE species follow a similar trend as PC but show no statistical significance. The acyl chain profiles of PI are significantly affected by overexpression of the LTPs (significance shown based on q-values).

# **Lipid extracts from HepG2 cells**

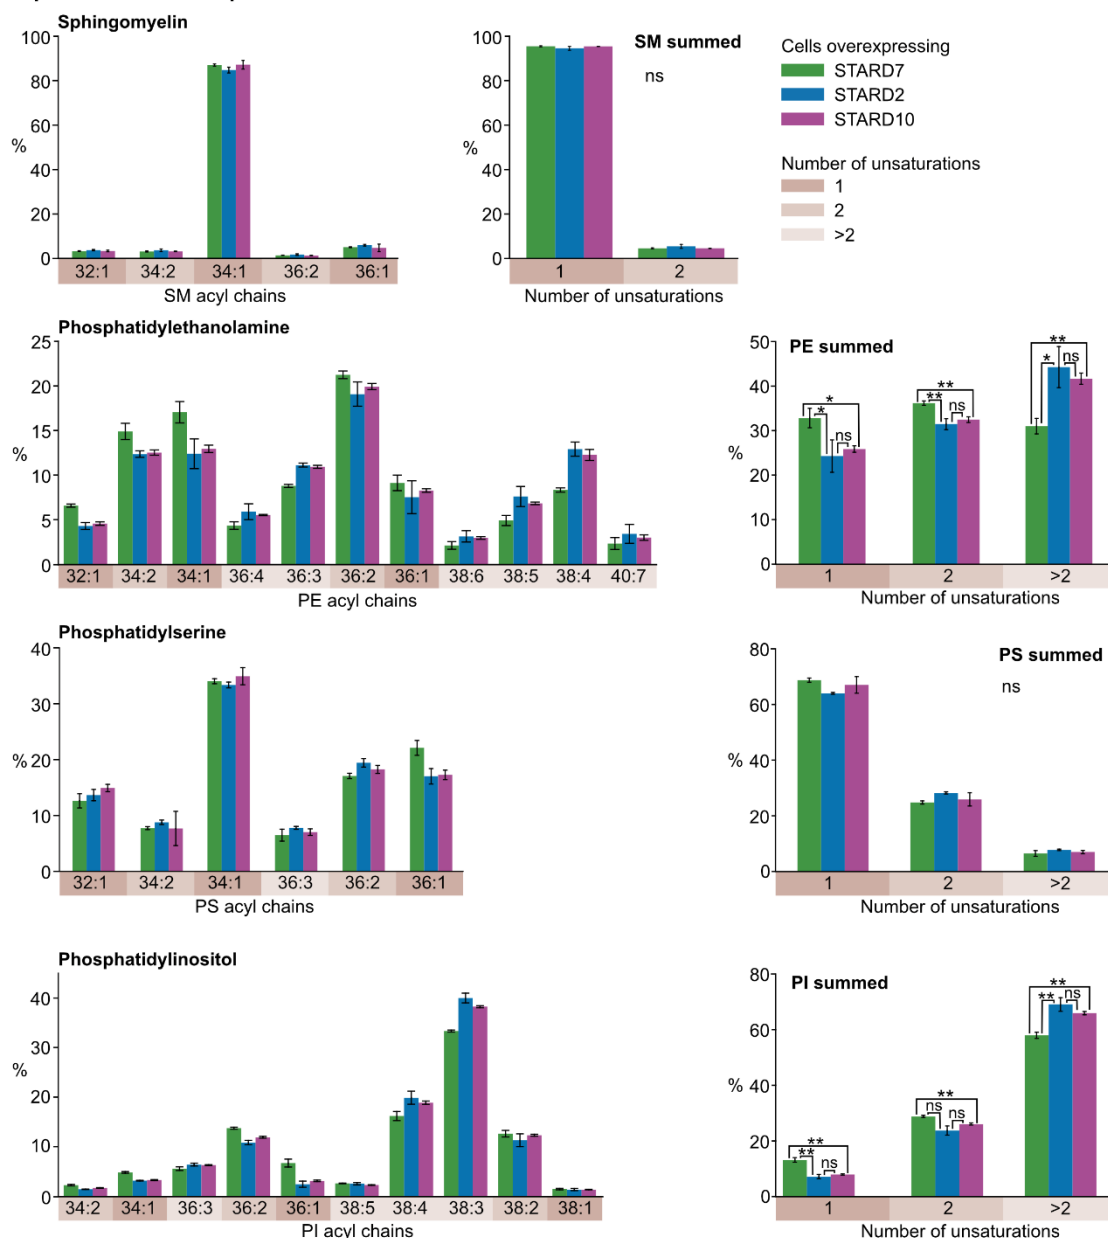

**Figure S17.** Acyl chain profiles of different phospholipid classes in HepG2 cells overexpressing STARD2, STARD7 or STARD10. PE and PI acyl chains change following a similar trend as PC (significance shown based on q-values).

### Quantification of protein knockdown

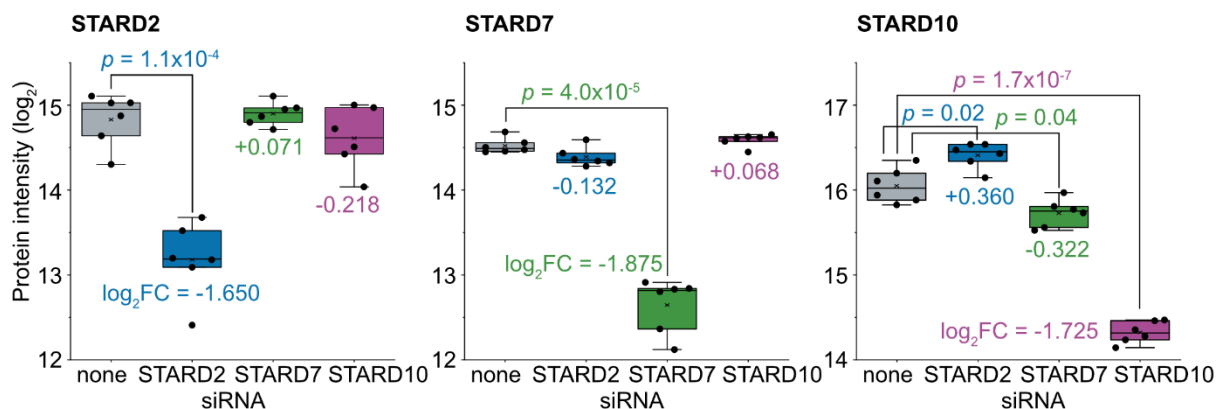

**Figure S18.** Changes in the cellular proteome upon siRNA-mediated knockdown of STARD2, STARD7 or STARD10 quantified by MS-based proteomics. p-values were obtained from pairwise Welch's t-tests comparing the control to each of the three siRNA knockdown conditions, with Bonferroni correction applied for multiple testing. Only statistically significant p-values are shown. Log<sub>2</sub>-fold changes are reported for all conditions relative to the control sample.

**Table S4.** Precursor isolation windows for dia-PASEF.

| Scan Type       | Ramp | Mass Start [Da] | Mass End [Da] | Ion mobility Start [Vs/cm <sup>2</sup> ] | Ion mobility End [Vs/cm <sup>2</sup> ] |
|-----------------|------|-----------------|---------------|------------------------------------------|----------------------------------------|
| MS <sup>1</sup> | 0    |                 |               |                                          |                                        |
| dia-PASEF       | 1    | 400             | 425           | 0.64                                     | 0.83                                   |
| dia-PASEF       | 1    | 600             | 625           | 0.83                                     | 1.01                                   |
| dia-PASEF       | 1    | 800             | 825           | 1.01                                     | 1.37                                   |
| dia-PASEF       | 2    | 425             | 450           | 0.64                                     | 0.85                                   |
| dia-PASEF       | 2    | 625             | 650           | 0.85                                     | 1.04                                   |
| dia-PASEF       | 2    | 825             | 850           | 1.04                                     | 1.37                                   |
| dia-PASEF       | 3    | 450             | 475           | 0.64                                     | 0.87                                   |
| dia-PASEF       | 3    | 650             | 675           | 0.87                                     | 1.06                                   |
| dia-PASEF       | 3    | 850             | 875           | 1.06                                     | 1.37                                   |
| dia-PASEF       | 4    | 475             | 500           | 0.64                                     | 0.90                                   |
| dia-PASEF       | 4    | 675             | 700           | 0.90                                     | 1.09                                   |
| dia-PASEF       | 4    | 875             | 900           | 1.09                                     | 1.37                                   |
| dia-PASEF       | 5    | 500             | 525           | 0.64                                     | 0.92                                   |
| dia-PASEF       | 5    | 700             | 725           | 0.92                                     | 1.11                                   |
| dia-PASEF       | 5    | 900             | 925           | 1.11                                     | 1.37                                   |
| dia-PASEF       | 6    | 525             | 550           | 0.64                                     | 0.94                                   |
| dia-PASEF       | 6    | 725             | 750           | 0.94                                     | 1.13                                   |
| dia-PASEF       | 6    | 925             | 950           | 1.13                                     | 1.37                                   |
| dia-PASEF       | 7    | 550             | 575           | 0.64                                     | 0.97                                   |
| dia-PASEF       | 7    | 750             | 775           | 0.97                                     | 1.16                                   |
| dia-PASEF       | 7    | 950             | 975           | 1.16                                     | 1.37                                   |
| dia-PASEF       | 8    | 575             | 600           | 0.64                                     | 0.99                                   |
| dia-PASEF       | 8    | 775             | 800           | 0.99                                     | 1.18                                   |
| dia-PASEF       | 8    | 975             | 1000          | 1.18                                     | 1.37                                   |

# siRNA-mediated protein knockdown

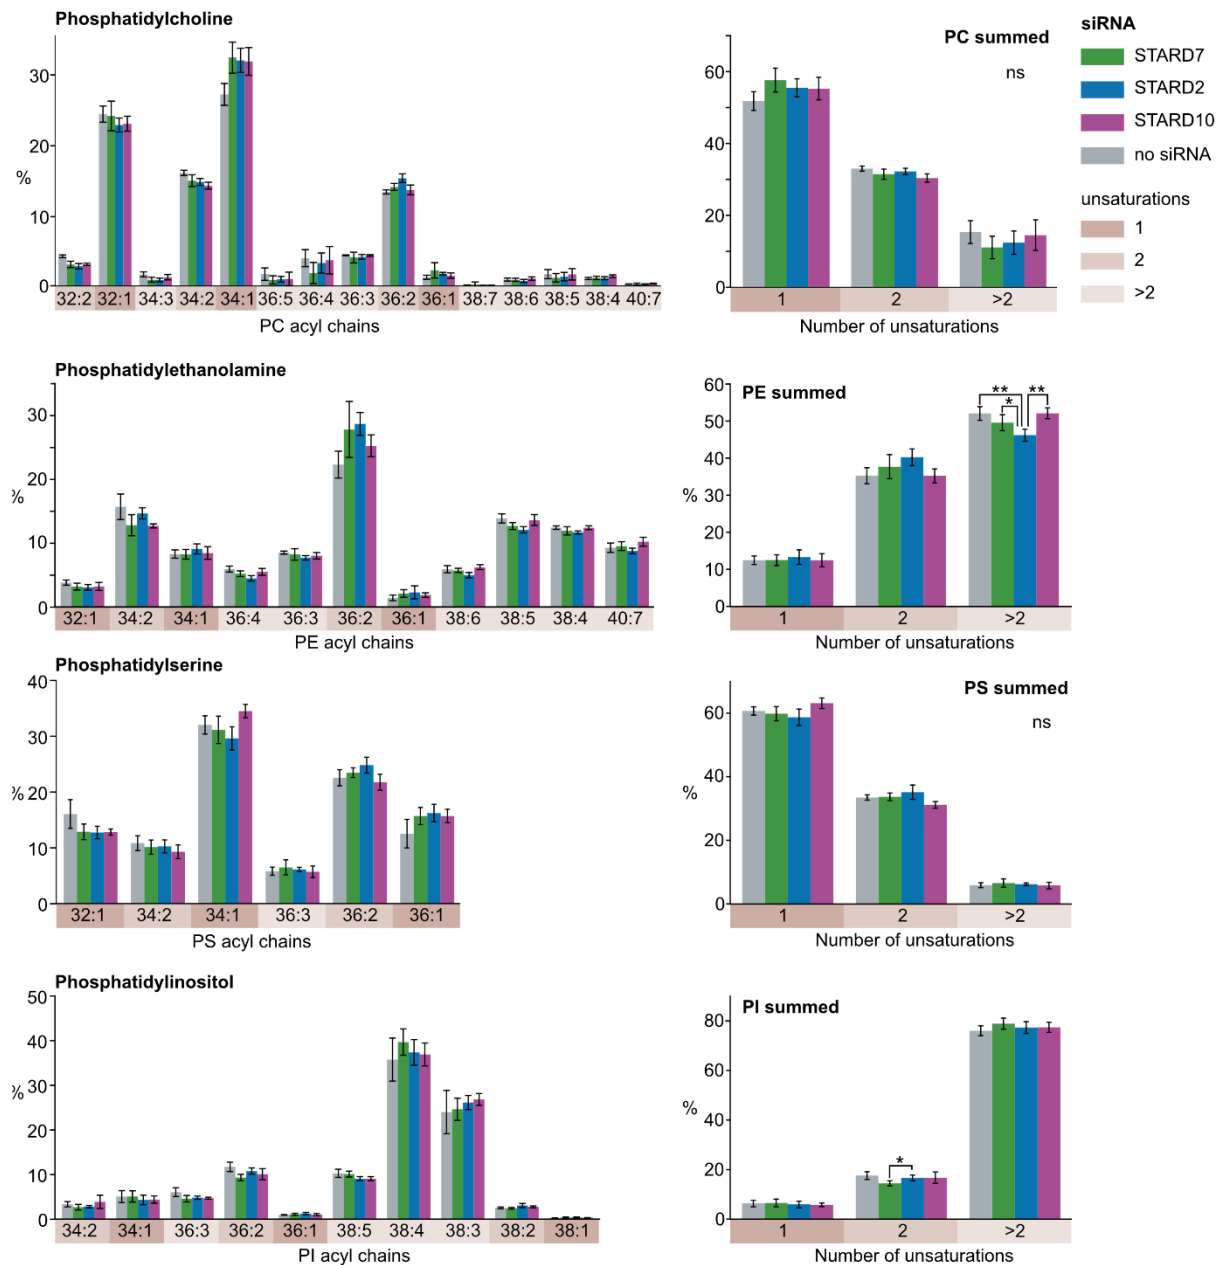

**Figure S19.** Acyl chain profiles of different phospholipid classes in HepG2 cells following 72 h siRNA-mediated knockdown of STARD2, STARD7 or STARD10. Polyunsaturated PE is reduced in STARD2 knockdown cells. Statistical significance is shown based on q-values.

### a Tissue-specific protein expression levels

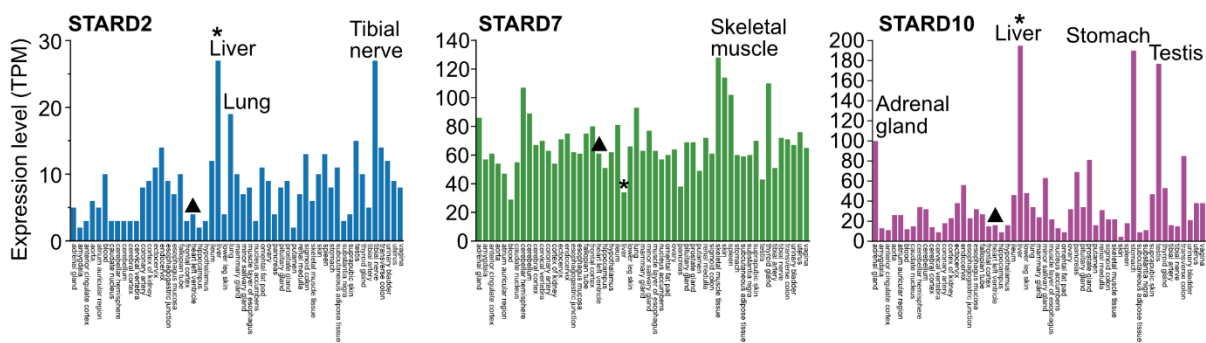

### b Tissue-specific distribution of PCs

*liver biopsies \**

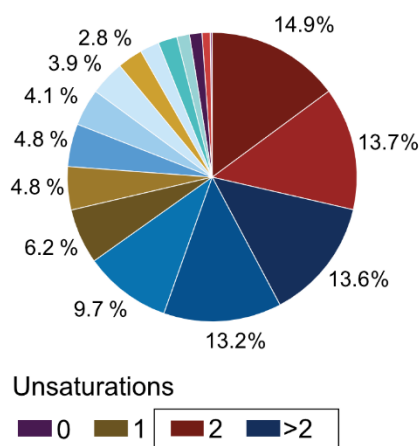

*heart left ventricular tissue ▲*

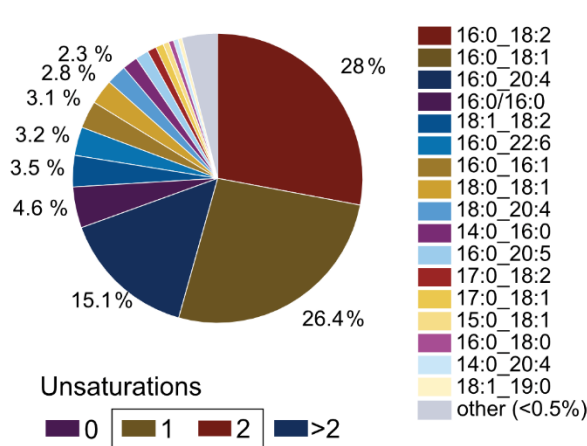

**Figure S20.** Correlation between expression levels of STARD phospholipid transfer proteins and phosphatidylcholines in different tissues. **a.** Expression levels of STARD2, STARD7, and STARD10 in different human tissues (TPM = transcripts per million). Data were exported from the EMBL-EBI Expression Atlas (<http://www.ebi.ac.uk/gxa>).<sup>1</sup> **b.** Variation of the PC acyl chain composition in different tissues. Lipidomics analysess of human liver<sup>2</sup> and heart left ventricular tissue<sup>3</sup> are exemplarily shown. The liver samples mainly contain doubly and polyunsaturated PC lipids that are preferred ligands of STARD10 and STARD2, respectively. Though individual acyl chains were not detected, we infer from lipidomics data on HepG2 cells that doubly unsaturated PC 36:2 and 34:2 carry one unsaturation in each chain. Heart tissue contains a larger fraction of monounsaturated PC, and the preferred ligands of STARD10 are not detected.

## In vitro lipid transfer assays

**a** STARD2 with donor liposomes

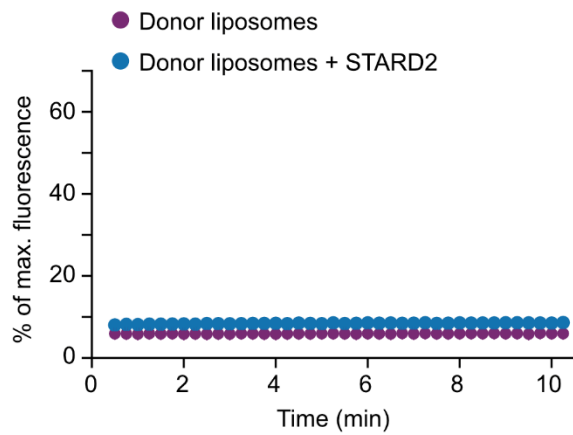

**b** STARD7 expressed in *E. coli* and HEK293S

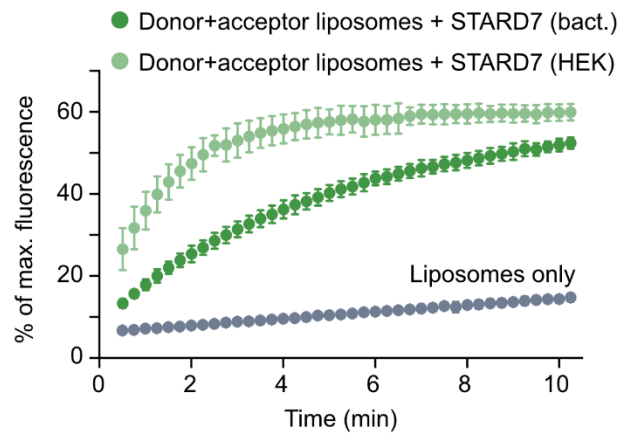

**Figure S21.** Control experiments for fluorescent lipid transfer assays. **a.** The addition of STARD2 to donor liposomes in the absence of acceptor liposomes yields constant fluorescence. **b.** STARD7 purified from HEK cells showed higher activity than STARD7 purified from bacteria.



## Molecular dynamics simulations

**a** DOPC binding in the STARD7 binding pocket

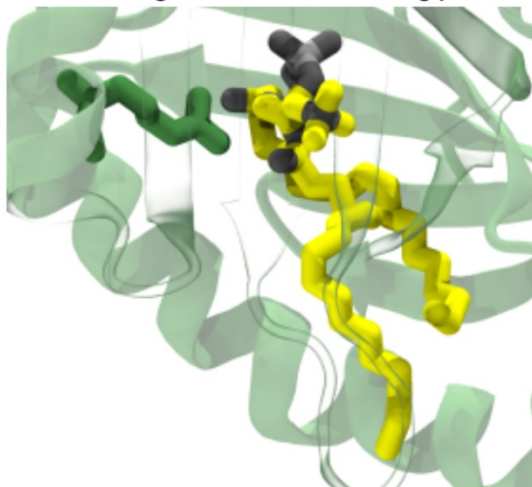

**b** Acetate binding to Arg189

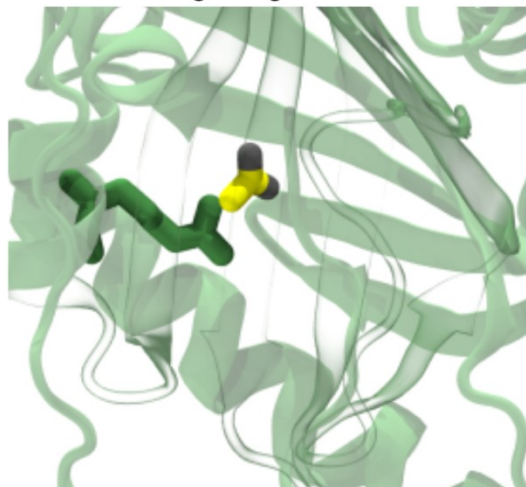

**Figure S22.** Boltz-2 prediction of the STARD7-acetate complex shows acetate binding to the conserved Arg189. **a.** Prediction of DOPC in the STARD7 lipid binding pocket. **b.** Prediction of acetate interacting with STARD7.

## References

- 1 Kapushesky, M. *et al.* Gene expression atlas at the European bioinformatics institute. *Nucleic Acids Res.* **38**, D690–698 (2010).
- 2 Fahy, E. Biomarkers of NAFLD progression: a lipidomics approach to an epidemic. Part 1: Liver (2018). Metabolomics Workbench. Study ID: ST000915. Project DOI: <https://doi.org/10.21228/M8V961>
- 3 Koay, Y. C. Metabolomics studies on human cardiac samples (2023). Metabolomics Workbench. Study ID: ST003104. Project DOI: <https://doi.org/10.21228/M8N42X>
