# Supplementary material for: Differential lipid selectivity of StARD phospholipid transporters revealed by native MS
Source: Research Square preprint supplement (doi:10.21203/rs.3.rs-8591680/v1), 2026-01-21
Supplement: Supplementary file 2 [file 91029d482c698a368ae8d2c4.pdf]

### **Information for access to raw files**

The mass spectrometry proteomics data have been deposited to the ProteomeXchange Consortium via the PRIDE partner repository with the dataset identifier PXD072869.

Log in to the PRIDE website using the following details:

Project accession: PXD072869

Token: QB43JTQmRpf7
